# Supplementary material
Source: PubMed Central journal article supplement (PMC4507344)
Supplement: JB.00374-15_zjb999093706so1.pdf [file JB.00374-15_zjb999093706so1.pdf]

**Table S1 Primers used in this study**

|               |                                                       |
|---------------|-------------------------------------------------------|
| Ppuc-sacB_FW1 | 5'-CTGGCGGCCAATAAGTCGCACCC                            |
| Ppuc-sacB_RV1 | 5'-CTTTTTGATGTTTCATGTTTCAGATCGTCAGTCACTGTGTC          |
| Ppuc-sacB_FW2 | 5'-GACTGACGATCTGAACATGAACATCAAAAAGTTTGCAAAAC          |
| Ppuc-sacB_RV2 | 5'-TTATTTGTAACTGTTAATTGTCC                            |
|               |                                                       |
| appA_up_F     | 5'-CTGCAGGTCGACTCTAGAGGATCCCCGCCGCCGGCAACGGGTC        |
| appA_up_R     | 5'-GAAAAAACAGGCGGTCAGGCGCTGCGGTCGTGTTGCATCCTTCGCCCC   |
| appA_down_F   | 5'-CGCAGCGCCTGACCGCCTGTTTTTTTCGTC                     |
| appA_down_R   | 5'-GCCAGTGAATTCGAGCTCGGTACCCCATGCGGCAGCGCCTCGAGCCAGAC |
|               |                                                       |
| BT-appA-F     | 5'-CGATGCAACACGACCTCGAGGCGGACG                        |
| TRG-appA-F    | 5'-GGCGGCATGCAACACGACCTCGAGGCGGACG                    |
| appA-R        | 5'-TCAGGCGCTGCGGCGGCGGTCCTGGC                         |
| BT-ppaA-F     | 5'-CGATGCACGATGGCTTGCAGAGAGACAG                       |
| TRG-ppaA-F    | 5'-GGCGGCATGCACGATGGCTTGCAGAGAGACAG                   |

|                |                                                                         |
|----------------|-------------------------------------------------------------------------|
| ppaA-R         | 5'-TCAAGCGCGGCCCGTCCGGGTCGCC                                            |
| BT-ppsR-F      | 5'-CGATGCTGGCCGGCGGGAGCCTCCCGT                                          |
| TRG-ppsR-F     | 5'-GGCGGCATGCTGGCCGGCGGGAGCCTCCCGT                                      |
| ppsR-R         | 5'-TCACTCGTCCTTGTTTCAGGAGGCCG                                           |
|                |                                                                         |
| MBP-mod-F      | 5'-<br>GATCCTTCACATGTCACATCATCATCATCACAGCAGCGGCATGGGTAAAATCGAAGAAGGTAAA |
| MBP-mod-R      | 5'-GAATTCGGATCCGCGCCATGGACTGGAAGTACAGGTTTTTCGGGC                        |
|                |                                                                         |
| Rsph-ppaA-F    | 5'-CCCGAAAACCTGTACTTCCAGTCCATGCACGATGGCTTGCAGAGAGACAG                   |
| Rsph-ppaA-R    | 5'-CTCGAATTCGGATCCGCGCCATTCAAGCGCGGCCCGTCCGGGTCG                        |
| Rcen-aerR-F    | 5'-CCCGAAAACCTGTACTTCCAGTCCCTTGTCGCAATCCTCGCTGACTG                      |
| Rcen-aerR-FL_F | 5'-CCCGAAAACCTGTACTTCCAGTCCATGAACGACTCCGTCGAATGGG                       |
| Rcen-aerR-R    | 5'-CTCGAATTCGGATCCGCGCCATTCAGCAGCCCGCAGGCATCAGGGC                       |
| Rpal-ppaA-F    | 5'-CCCGAAAACCTGTACTTCCAGTCCATGACGGACTGGGACGACCCTCCG                     |
| Rpal-ppaA-R    | 5'-CTCGAATTCGGATCCGCGCCATTCAGCTCTTGTTCCGCGCGGCGTG                       |

|                        |                                                     |
|------------------------|-----------------------------------------------------|
| Rgel-aerR-F            | 5'-CCCGAAAACCTGTACTTCCAGTCCATGGTGAGTCCGGCTGCCTGCGCC |
| Rgel-aerR-R            | 5'-CTCGAATTCGGATCCGCGCCATTCATCGCCGTCCCGCTTTCGCTGC   |
|                        |                                                     |
| QC-PpaA-<br>H146A-F    | 5'-CTGCCGCCCGGCGAGCAGGCCACTCTGGGAGCCATGGTGGCGG      |
| QC-PpaA-<br>H146A-R    | 5'-CCGCCACCATGGCTCCCAGAGTGGCCTGCTCGCCGGGCGGCAG      |
| QC-PpaA-<br>G149E-F    | 5'-GCGAGCAGCACACTCTGGAAGCCATGGTGGCGGTGG             |
| QC-PpaA-<br>G149E-R    | 5'-CCACCGCCACCATGGCTTCCAGAGTGTGCTGCTCGC             |
| QC-PpaA-<br>L248Stop-F | 5'-CGAACGACATTGAGGCGGCGTGACAGGCCTGCGGGCTGGGCGG      |
| QC-PpaA-<br>L248Stop-R | 5'-CCGCCAGCCCGCAGGCCTGTCACGCCGCCTCAATGTCGTTTCG      |
|                        |                                                     |

**Table S2 Strains used in this study**

| Name                            | Description                                                  | Source                                                           |
|---------------------------------|--------------------------------------------------------------|------------------------------------------------------------------|
| Rhodobacter sphaeroides<br>HR   | Wildtype strain                                              | Gift from Dr. F. Robert<br>Tabita (The Ohio State<br>University) |
| Rhodobacter sphaeroides<br>appA | Strain HR with a genomic<br>deletion of appA                 | This study                                                       |
| E. coli BL21(DE3)               | E. coli strain for production<br>of proteins                 |                                                                  |
| E. coli DH5                     | E.coli strain used for<br>cloning purposes                   |                                                                  |
| E. coli XL1 Blue MRF'           | E. coli strain used for two-<br>hybrid screen                | Agilent                                                          |
|                                 |                                                              |                                                                  |
| pET-MBP                         | Plasmid pET28b(+) with<br>His6-MBP-TEV construct             | This study                                                       |
| pET-MBP-ppaA                    | Plasmid pET-MBP with<br>ppaA from Rhodobacter<br>sphaeroides | This study                                                       |
| pET-MBP-ppaA-H146A              | Plasmid pET-MBP-ppaA<br>with a H146A point<br>mutation       | This study                                                       |

|                       |                                                                                                              |            |
|-----------------------|--------------------------------------------------------------------------------------------------------------|------------|
| pET-MBP-ppaA-L248Stop | Plasmid pET-MBP-ppaA with L248 mutated to a stop codon                                                       | This study |
| pET-MBP-ppaA-G149E    | Plasmid pET-MBP-ppaA with a G149E mutation                                                                   | This study |
| pET-MBP-Rpal-ppaA     | Plasmid pET-MBP with ppaA from <i>Rhodopseudomonas palustris</i>                                             | This study |
| pET-MBP-Rcen-aerR     | Plasmid pET-MBP with aerR from <i>Rhodospirillum centenum</i>                                                | This study |
| pET-MBP-Rcen-aerR-FL  | Similar to pET-MBP-Rcen-aerR, with adjusted start codon (an in-frame ATG 174 bp 5' of annotated start codon) | This study |
| pET-MBP-Mex-ppaA      | Plasmid pET-MBP with ppaA from <i>Methylobacterium extorquens</i>                                            | This study |
| pET-MBP-JaCCS1-ppaA   | Plasmid pET-MBP with ppaA from <i>Jannaschia</i> sp.                                                         | This study |

|                   |                                                                    |            |
|-------------------|--------------------------------------------------------------------|------------|
|                   | CCS1                                                               |            |
| pET-MBP-Rgel-aerR | Plasmid pET-MBP with aerR from <i>Rubrivivax gelatinosus</i>       | This study |
| pET-MBP-NAP1-ppaA | Plasmid pET-MBP with ppaA from <i>Erythrobacter</i> sp. NAP1       | This study |
|                   |                                                                    |            |
| pBT               | Bait plasmid of the BacterioMatch II bacterial-two-hybrid screen   | Agilent    |
| pTRG              | Target plasmid of the BacterioMatch II bacterial-two-hybrid screen | Agilent    |
| pBT-LGF2          | Control bait plasmid                                               | Agilent    |
| pTRG-Gal11p       | Control target plasmid                                             | Agilent    |
| pBT-ppaA          | Bait plasmid with ppaA                                             | This study |
| pBT-ppsR          | Bait plasmid with ppsR                                             | This study |
| pBT-appA          | Bait plasmid with appA                                             | This study |
| pTRG-ppaA         | Target plasmid with ppaA                                           | This study |
| pTRG-ppsR         | Target plasmid with ppsR                                           | This study |
| pTRG-appA         | Target plasmid with appA                                           | This study |
|                   |                                                                    |            |

|                 |                                                      |                   |
|-----------------|------------------------------------------------------|-------------------|
| pAJV1           | Suicide plasmid                                      | This study        |
| pAJV1-appA      | Suicide plasmid with 500 bp flanking regions of appA | This study        |
|                 |                                                      |                   |
| pSRKkm          | Broad host range expression plasmid                  | Khan et al., 2008 |
| pSRK-ppaA       | pSRKkm with wildtype ppaA                            | This study        |
| pSRK-ppaA-H146A | pSRKkm with ppaA-H146A                               | This study        |
| pSRK-ppaA-G149E | pSRKkm with ppaA-G149E                               | This study        |
